# Supplementary material for: TRPM8 thermosensation in poikilotherms mediates both skin colour and locomotor performance responses to cold temperature
Source: PubMed Central journal article supplement (PMC9889708; doi:10.1038/s42003-023-04489-8), 2023-01-31
Supplement: 42003_2023_4489_MOESM2_ESM.pdf [file 42003_2023_4489_MOESM2_ESM.pdf]

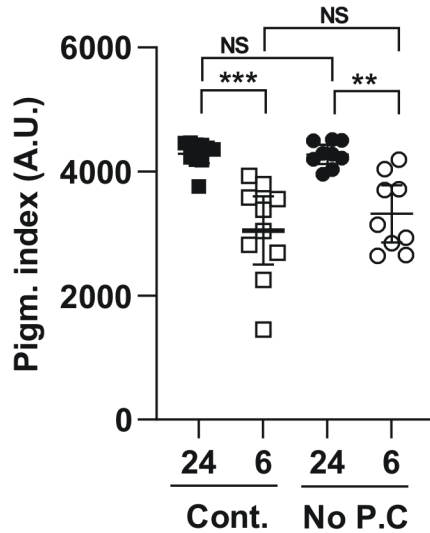

**Supplementary Figure 1: Aggregation induced by cooling is independent of melatonin released by the pineal complex.** Head pigmentation index of control (cont.) tadpoles or those pinealectomized 24 h before temperature treatment (No P.C.). Tadpoles were switched from 24 °C to 6 °C for 30 minutes. Each dot represented the measurement in one tadpole, and the bar is the mean with 95% confident interval; n=8 embryos; N=2 independent experiments; \*\* p < 0.01, \*\*\* p < 0.001; ANOVA followed by Bonferroni's test.

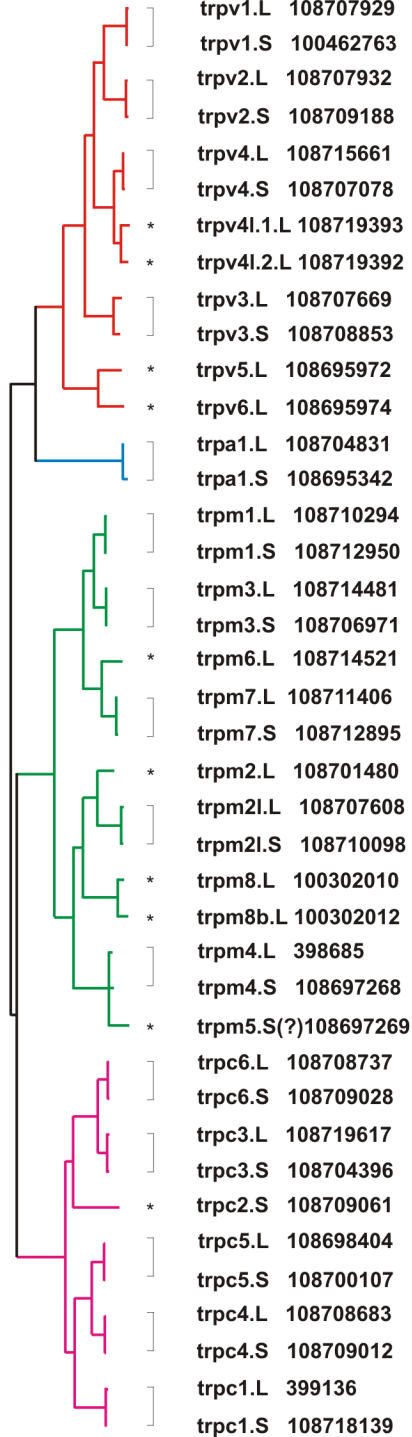

**Supplementary Figure 2: Trp channels from group1 identified in *X. laevis*.** A molecular phylogenetic analysis of group 1 family *Xenopus laevis* trp channel genes. The tree was performed by molecular phylogenetic analysis by the maximum-likelihood method using the public domain MEGA X version 10.04 software and is not drawn to scale. TRPV (red lines), TRPA (blue line), TRPM (green lines) and TRPC (purple lines) subfamilies are represented. Predicted amino acid sequences were aligned by MUSCLE. Phylogenetic analysis shows duplicated genes localized on the long (L) and short (S) homologous chromosomes of the allotetraploid species that remain conserved (brackets)<sup>52</sup>, with other genes reduced to a single copy (asterisks). The gene numbers are indicated.

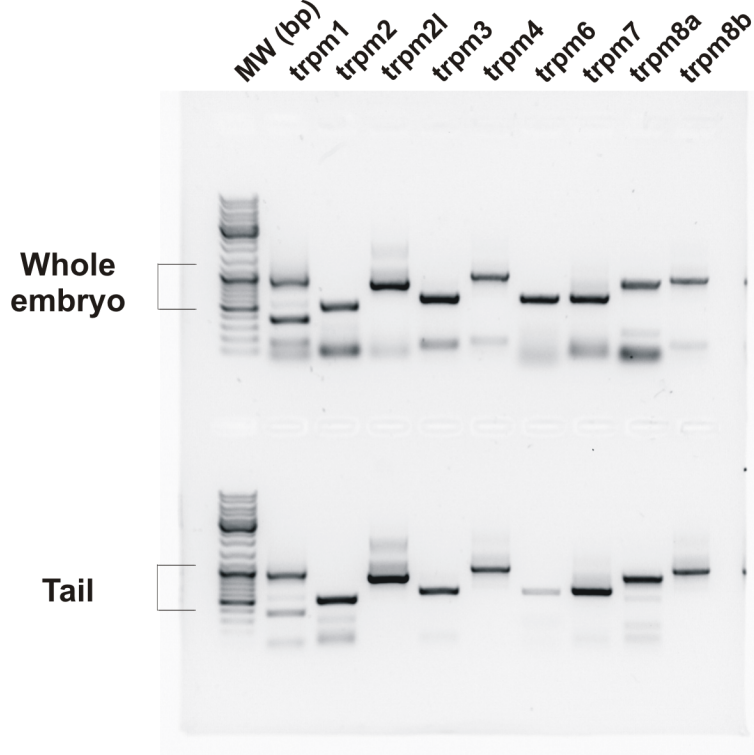

**Supplementary Figure 3:** Uncropped and unedited gel showing the RT-PCR analysis of mRNA expression for *trpm1*-*trpm8b* in the whole embryo (top) and tail (bottom) at stage 42/43. Indicated are the areas showed in Figure 3A.



**a**

|           |     |                                                                 |
|-----------|-----|-----------------------------------------------------------------|
| Human     | 891 | RWRWIFRSVIYEPYLAMFGQVPSDVDGTTYDFAHCTFTGNESKPLCVELDEHNLPRFPEW    |
|           |     | RW WIFRSVIYEPYLA +FGQ +DVDGTTYDF HCT TGNESKPLCVE+D + PRFPEW     |
| X. Laevis | 931 | RWEWIFRSVIYEPYLAV FGQYI ADVDGTTYDFDHCTVTGNESKPLCDEMDSHDHNRFPPEW |

**b**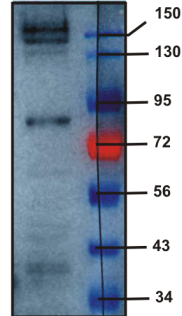

**Supplementary Figure 5: Immunoreactivity against TRPM8.** **a)** BLAST alignment illustrating similarity between the epitope used to generate an antibody against human TRPM8 (Human; (NP\_076085.4) and the orthologous Trpm8a sequence in Xenopus (*X. laevis*; XP\_018089453.1). The region recognized by the antibody is highlighted in red. **b)** Western blot of stage 42/43 Xenopus larvae with the anti-human TRPM8 antibody indicates doublet >130 kDa bands. Molecular markers (kDa) are indicated.

**Supplementary Table 1.** Trpm channels identified, and partial sequences cloned

| Name     | Model<br>Entrez<br>gene ID | Predicted mRNA | Vector     | Gene Bank<br>Acc #<br>(Seq. cloned) | bp<br>cloned | McFarlane<br>plasmid<br>number |
|----------|----------------------------|----------------|------------|-------------------------------------|--------------|--------------------------------|
| Trpa1.S  | 108695342                  | XM_018223798.1 | pCRII Topo | ON156681                            | 1063         | #974                           |
| Trpm8.L  | 100302010                  | NM_001161594.2 | pCRII Topo | ON380668                            | 884          | #975                           |
| Trpm7.L  | 108711406                  | NM_001191021.3 | pCRII Topo | ON380669                            | 650          | #977                           |
| Trpm8b.L | 100302012                  | NM_001161595.2 | pCRII Topo | ON380670                            | 1177         | #978                           |
| Trpm1l   | 108710294                  | XM_018251436.1 | pCRII Topo | ON380671                            | 958          | #981                           |
| Trpm2l   | 108707608                  | XM_018245598.1 | pCRII Topo | ON380672                            | 829          | #982                           |
| Trpm3.L  | 108714481                  | XM_018258772.1 | pCRII Topo | ON380673                            | 606          | #983                           |
| Trpm6.L  | 108714521                  | XM_018258825.1 | pCRII Topo | ON380674                            | 610          | #984                           |
| Trpm2.L  | 108701480                  | XM_018236213.1 | pCRII Topo | ON380675                            | 895          | #985                           |
| Trpm4.L  | 398685                     | XM_018226434.1 | pCRII Topo | ON380676                            | 987          | #986                           |
